# Supplementary material
Source: PubMed Central journal article supplement (PMC8755602)
Supplement: NIHMS1758580-supplement-Supplement_4.pdf [file NIHMS1758580-supplement-Supplement_4.pdf]

\*Indicates required information. Only first name, last name, and suffix will appear in PubMed.

| *Group Name(s): INSPIRE-FLO Investigators |                |             |          |             |                              |                         |                                                                                            |  |  |  |  |  |
|-------------------------------------------|----------------|-------------|----------|-------------|------------------------------|-------------------------|--------------------------------------------------------------------------------------------|--|--|--|--|--|
| *First Name and Middle Initial            | *Last Name     | *Suffix (eg | Academic | Institution | Location (city, state/provin | Role or Contribution, e | Group (if more than 1 Group listed in the byline) and/or Subgroup (eg, Steering Committee) |  |  |  |  |  |
| Angelito                                  | Agbo           |             |          |             |                              |                         |                                                                                            |  |  |  |  |  |
| Terry                                     | Ainsworth      |             |          |             |                              |                         |                                                                                            |  |  |  |  |  |
| Hakim A                                   | Ali            |             |          |             |                              |                         |                                                                                            |  |  |  |  |  |
| Samuel                                    | Belgique       |             |          |             |                              |                         |                                                                                            |  |  |  |  |  |
| Tiffany                                   | Bisanar        |             |          |             |                              |                         |                                                                                            |  |  |  |  |  |
| Michael                                   | Blank          |             |          |             |                              |                         |                                                                                            |  |  |  |  |  |
| Desiree                                   | Bonadonna      |             |          |             |                              |                         |                                                                                            |  |  |  |  |  |
| Jason                                     | Boyle          |             |          |             |                              |                         |                                                                                            |  |  |  |  |  |
| Carla                                     | Bremenour      |             |          |             |                              |                         |                                                                                            |  |  |  |  |  |
| Jessica                                   | Burroughs      |             |          |             |                              |                         |                                                                                            |  |  |  |  |  |
| Rachel                                    | Byelene        |             |          |             |                              |                         |                                                                                            |  |  |  |  |  |
| Anne                                      | Cherry         |             |          |             |                              |                         |                                                                                            |  |  |  |  |  |
| Carl                                      | Clark          |             |          |             |                              |                         |                                                                                            |  |  |  |  |  |
| Kristen                                   | Collins        |             |          |             |                              |                         |                                                                                            |  |  |  |  |  |
| Taryn                                     | Cooper         |             |          |             |                              |                         |                                                                                            |  |  |  |  |  |
| Kelsey                                    | Decker         |             |          |             |                              |                         |                                                                                            |  |  |  |  |  |
| Jose M                                    | Del Rio        |             |          |             |                              |                         |                                                                                            |  |  |  |  |  |
| Shruti                                    | Desai          |             |          |             |                              |                         |                                                                                            |  |  |  |  |  |
| Sebastian                                 | Diaz           |             |          |             |                              |                         |                                                                                            |  |  |  |  |  |
| Jill                                      | Engel          |             |          |             |                              |                         |                                                                                            |  |  |  |  |  |
| William                                   | Fulkerson      | Jr.         |          |             |                              |                         |                                                                                            |  |  |  |  |  |
| Loreta                                    | Greco          |             |          |             |                              |                         |                                                                                            |  |  |  |  |  |
| Nazish                                    | Hashmi         |             |          |             |                              |                         |                                                                                            |  |  |  |  |  |
| Teresa                                    | Hoskins        |             |          |             |                              |                         |                                                                                            |  |  |  |  |  |
| Ehimemen                                  | Iboaya         |             |          |             |                              |                         |                                                                                            |  |  |  |  |  |
| Carrie                                    | Johnson        |             |          |             |                              |                         |                                                                                            |  |  |  |  |  |
| Mandisa-Maia                              | Jones          |             |          |             |                              |                         |                                                                                            |  |  |  |  |  |
| Jorn                                      | Karhausen      |             |          |             |                              |                         |                                                                                            |  |  |  |  |  |
| Joel                                      | Kester         |             |          |             |                              |                         |                                                                                            |  |  |  |  |  |
| Casi                                      | Larish         |             |          |             |                              |                         |                                                                                            |  |  |  |  |  |
| Trevor                                    | Lee            |             |          |             |                              |                         |                                                                                            |  |  |  |  |  |
| Jessica                                   | Lumbard        |             |          |             |                              |                         |                                                                                            |  |  |  |  |  |
| Yasmine                                   | Maisonave      |             |          |             |                              |                         |                                                                                            |  |  |  |  |  |
| Negmeldeen                                | Mamoun         |             |          |             |                              |                         |                                                                                            |  |  |  |  |  |
| Michael                                   | Manning        |             |          |             |                              |                         |                                                                                            |  |  |  |  |  |
| Joseph                                    | Mathew         |             |          |             |                              |                         |                                                                                            |  |  |  |  |  |
| Sharon                                    | McCartney      |             |          |             |                              |                         |                                                                                            |  |  |  |  |  |
| Lynn                                      | McGugan        |             |          |             |                              |                         |                                                                                            |  |  |  |  |  |
| Beth                                      | McLendon-Arvik |             |          |             |                              |                         |                                                                                            |  |  |  |  |  |
| Amber                                     | Mcvey          |             |          |             |                              |                         |                                                                                            |  |  |  |  |  |
| Omar                                      | Mohamedaly     |             |          |             |                              |                         |                                                                                            |  |  |  |  |  |
| Margaret A                                | Murphy         |             |          |             |                              |                         |                                                                                            |  |  |  |  |  |
| Alina                                     | Nicoara        |             |          |             |                              |                         |                                                                                            |  |  |  |  |  |
| Thomas                                    | Owens          |             |          |             |                              |                         |                                                                                            |  |  |  |  |  |
| Scott                                     | Palmer         |             |          |             |                              |                         |                                                                                            |  |  |  |  |  |
| Jhana                                     | Parikh         |             |          |             |                              |                         |                                                                                            |  |  |  |  |  |
| Matthew                                   | Pipeling       |             |          |             |                              |                         |                                                                                            |  |  |  |  |  |
| Mihai                                     | Podgoreanu     |             |          |             |                              |                         |                                                                                            |  |  |  |  |  |
| Angela                                    | Pollak         |             |          |             |                              |                         |                                                                                            |  |  |  |  |  |
| Dayana                                    | Ramos          |             |          |             |                              |                         |                                                                                            |  |  |  |  |  |

\*Indicates required information. Only first name, last name, and suffix will appear in PubMed.

| *First Name and Middle Initial | *Last Name     | *Suffix (eg | Academic | Institution | Location (city, state/provin | Role or Contribution, e | Group (if more than 1 Group listed in the byline) and/or Subgroup (eg, Steering Committee) |  |  |  |  |  |  |  |
|--------------------------------|----------------|-------------|----------|-------------|------------------------------|-------------------------|--------------------------------------------------------------------------------------------|--|--|--|--|--|--|--|
| Claudette                      | Ramsey         |             |          |             |                              |                         |                                                                                            |  |  |  |  |  |  |  |
| Jake                           | Ribet          |             |          |             |                              |                         |                                                                                            |  |  |  |  |  |  |  |
| Erick                          | Saldivar       |             |          |             |                              |                         |                                                                                            |  |  |  |  |  |  |  |
| Amy                            | Shing          |             |          |             |                              |                         |                                                                                            |  |  |  |  |  |  |  |
| Laurie                         | Snyder         |             |          |             |                              |                         |                                                                                            |  |  |  |  |  |  |  |
| Kevin                          | Sowers         |             |          |             |                              |                         |                                                                                            |  |  |  |  |  |  |  |
| Amanda                         | Spiritos       |             |          |             |                              |                         |                                                                                            |  |  |  |  |  |  |  |
| Mark                           | Stafford-Smith |             |          |             |                              |                         |                                                                                            |  |  |  |  |  |  |  |
| Fabian                         | Stone          |             |          |             |                              |                         |                                                                                            |  |  |  |  |  |  |  |
| Madhav                         | Swaminathan    |             |          |             |                              |                         |                                                                                            |  |  |  |  |  |  |  |
| Annemarie                      | Thompson       |             |          |             |                              |                         |                                                                                            |  |  |  |  |  |  |  |
| Jamie                          | Todd           |             |          |             |                              |                         |                                                                                            |  |  |  |  |  |  |  |
| Dean                           | Van Hart       |             |          |             |                              |                         |                                                                                            |  |  |  |  |  |  |  |
| Eleanor                        | Vega           |             |          |             |                              |                         |                                                                                            |  |  |  |  |  |  |  |
| Cameron                        | Wells          |             |          |             |                              |                         |                                                                                            |  |  |  |  |  |  |  |
| Ian                            | Welsby         |             |          |             |                              |                         |                                                                                            |  |  |  |  |  |  |  |
| Meredith                       | Whitacre       |             |          |             |                              |                         |                                                                                            |  |  |  |  |  |  |  |
| Jordan                         | Whitson        |             |          |             |                              |                         |                                                                                            |  |  |  |  |  |  |  |
| Barbara                        | Wiernek        |             |          |             |                              |                         |                                                                                            |  |  |  |  |  |  |  |
| Genevieve                      | Wroblewski     |             |          |             |                              |                         |                                                                                            |  |  |  |  |  |  |  |
| Vincent                        | Yeboah         |             |          |             |                              |                         |                                                                                            |  |  |  |  |  |  |  |
| Lorenzo                        | Zaffiri        |             |          |             |                              |                         |                                                                                            |  |  |  |  |  |  |  |
